# Supplementary material for: Cobalt phosphite microarchitectures assembled by ultralong nanoribbons and their application as effective electrochemical capacitor electrode materials
Source: Royal Society of Chemistry journal article supplement (doi:10.1039/c2nr32597g), 2012-10-23
Supplement: c2nr32597g.pdf [file c2nr32597g.pdf]

## Electronic Supplementary Information (ESI)

### Calculation

The specific capacitance of an electrode during galvanostatic charge/discharge can be calculated by the following equation: <sup>1</sup>

$$C = \frac{i \cdot \Delta t}{m \cdot \Delta V} \quad (1)$$

Where  $m$  is the mass of activated materials (g),  $\Delta V$  is the range of charge/discharge (V), and  $i$  is the discharge current (A) applied for time  $\Delta t$  (s).

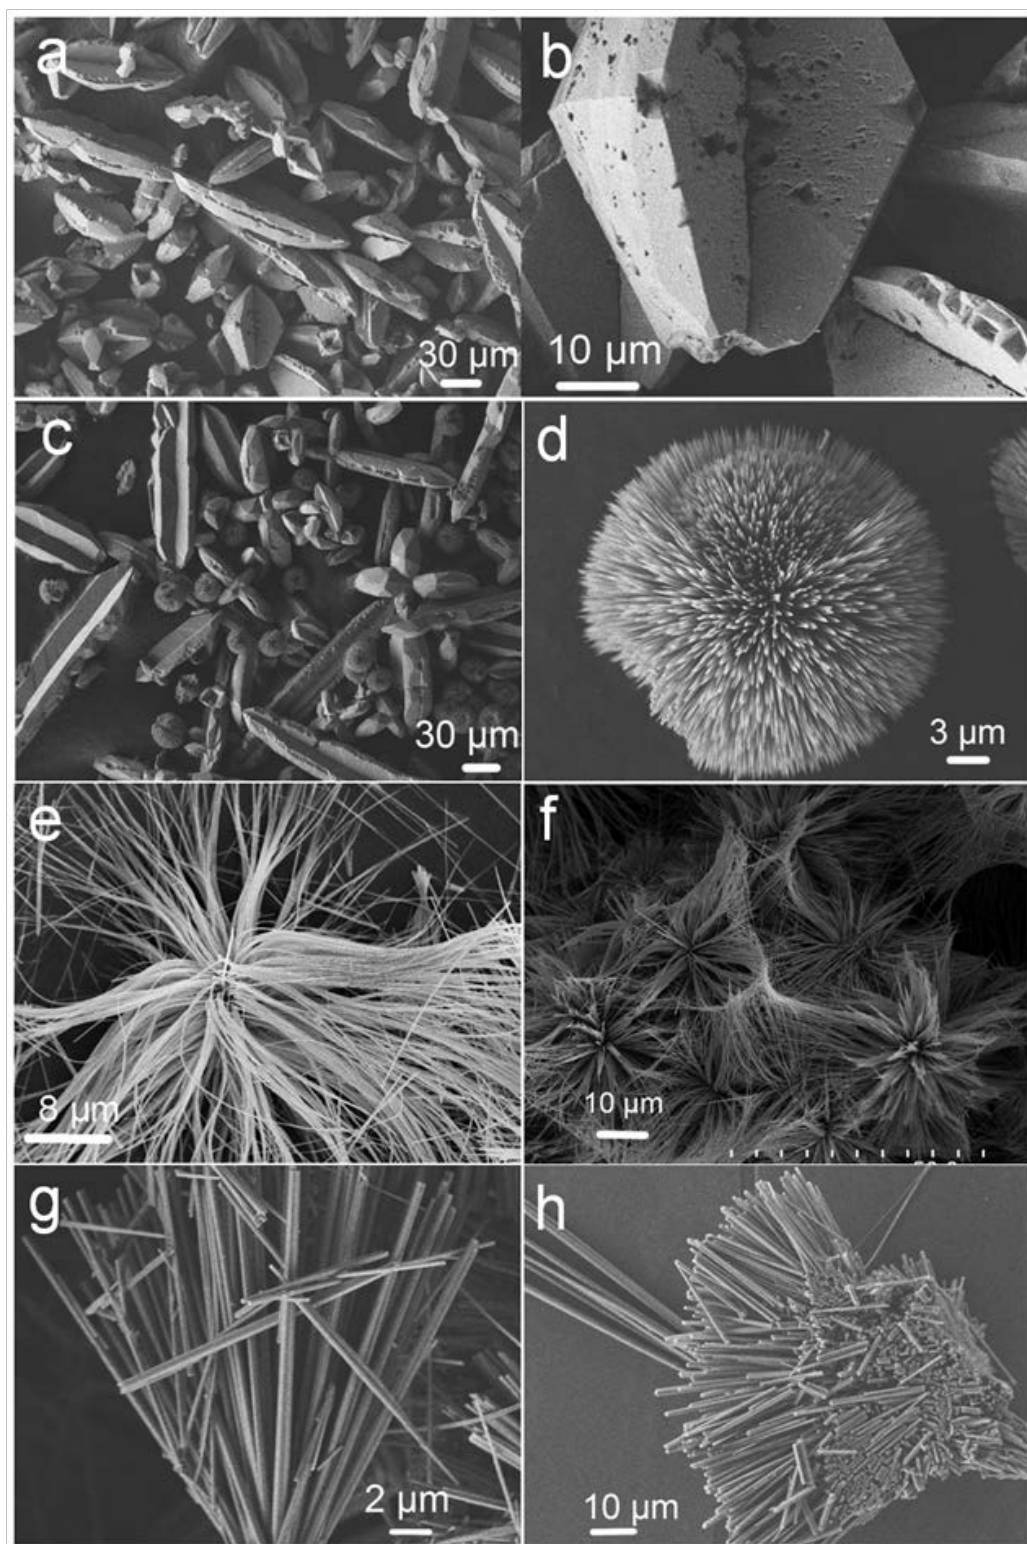

ESI Fig. 1 SEM images of the product obtained: 0.28 g cobalt chloride and 0.30 g sodium pyrophosphate were mixed with 20 mL deionized water, maintained at 200 °C for different times. (a, b) 24 hours; (c, d) 72 hours; (e, f) 6 days; (g, h) 10 days.

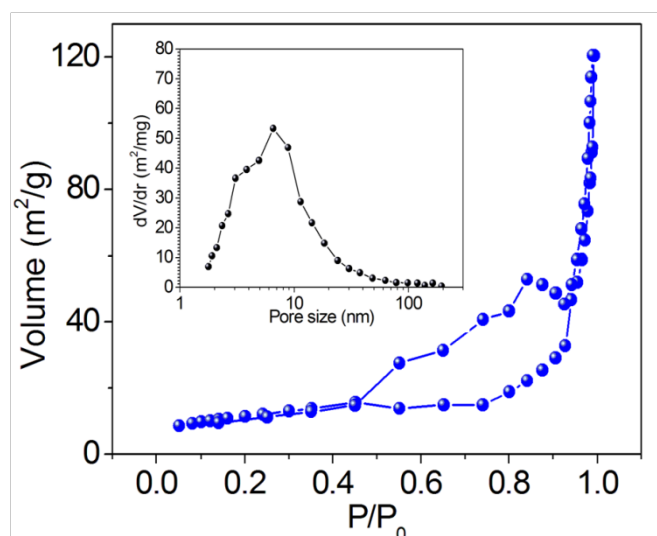

ESI Fig. 2 Brunauer-Emmett-Teller measurements of  $\text{Co}_{11}(\text{HPO}_3)_8(\text{OH})_6$  microarchitectures; in inset of it corresponding Barrett-Joyner-Halenda pore size distribution curve.

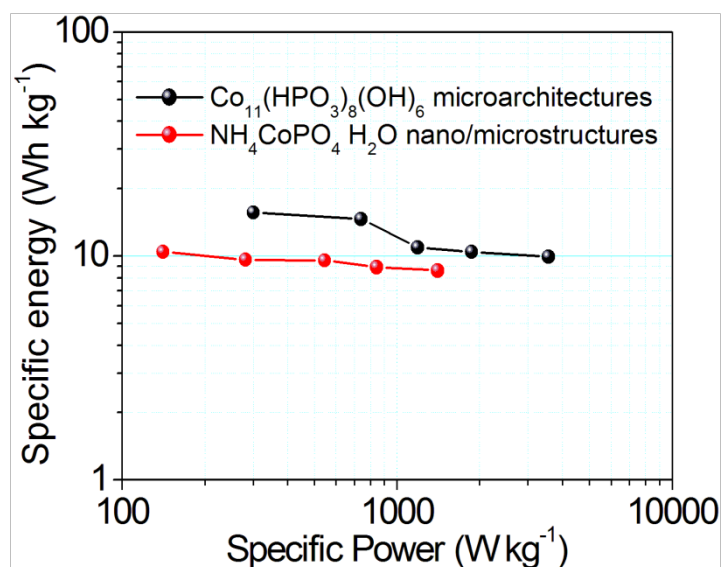

ESI Fig. 3 Ragone plot of the estimated specific energy and specific power at various charge/discharge rates.

## Reference

1. L. H. Bao, J. F. Zang and X. D. Li, *Nano Lett.*, 2010, **10**, 1021.
